# Supplementary material
Source: PubMed Central journal article supplement (PMC2941976)
Supplement: NIHMS141662-supplement-Supp_Mat.pdf [file NIHMS141662-supplement-Supp_Mat.pdf]

# Supplemental Tables and Figures: Scalable Analysis of Flow Cytometry Data using R/Bioconductor

David J. Klinke II<sup>1,2</sup> and Kathleen M. Brundage<sup>2</sup>

<sup>1</sup>Department of Chemical Engineering

<sup>2</sup>Department of Immunology, Microbiology, & Cell Biology  
West Virginia University  
Morgantown, WV 25606

April 21, 2009

Contact Info:

david.klinke@mail.wvu.edu

Phone: (304)293-2111 ext 2432

Fax: (304)293-4139

Department of Chemical Engineering

West Virginia University

P.O. Box 6102

Morgantown, WV 26506-6102

## Supplemental Tables and Figures

Table S-1: Number of cells retained for each sample following gating

|   | Files               | Total.Cells | Live.Cells | Percent |
|---|---------------------|-------------|------------|---------|
| 1 | Pre-sort Unstained  | 10000       | 6784       | 67.84   |
| 2 | FITC-CD4 Single     | 10000       | 6355       | 63.55   |
| 3 | PE-CD44 Single      | 10000       | 6508       | 65.08   |
| 4 | APC-CD62L Single    | 10000       | 6301       | 63.01   |
| 5 | Pre-sort Population | 10000       | 6090       | 60.90   |
| 6 | CD4+ Subset         | 10000       | 7500       | 75.00   |
| 7 | CD4- Subset         | 10000       | 6150       | 61.50   |
| 8 | CD4+CD62L+ Subset   | 10000       | 7143       | 71.43   |
| 9 | CD4+CD62L- Subset   | 10000       | 7165       | 71.65   |

Table S-2: Median fluorescence in each channel shown for each sample.

|   | Files               | FITC<br>Area | PE<br>Area | APC<br>Area |
|---|---------------------|--------------|------------|-------------|
| 1 | Pre-sort Unstained  | 62.40        | 51.48      | 68.88       |
| 2 | FITC-CD4 Single     | 68.64        | 95.16      | 29.52       |
| 3 | PE-CD44 Single      | 71.76        | 762.84     | 19.68       |
| 4 | APC-CD62L Single    | 46.80        | 12.48      | 266.91      |
| 5 | Pre-sort Population | 100.62       | 837.72     | 227.55      |
| 6 | CD4+ Subset         | 1837.68      | 1184.04    | 838.86      |
| 7 | CD4- Subset         | 84.24        | 533.52     | 172.20      |
| 8 | CD4+CD62L+ Subset   | 1723.80      | 946.92     | 632.22      |
| 9 | CD4+CD62L- Subset   | 1698.84      | 1463.28    | 573.18      |

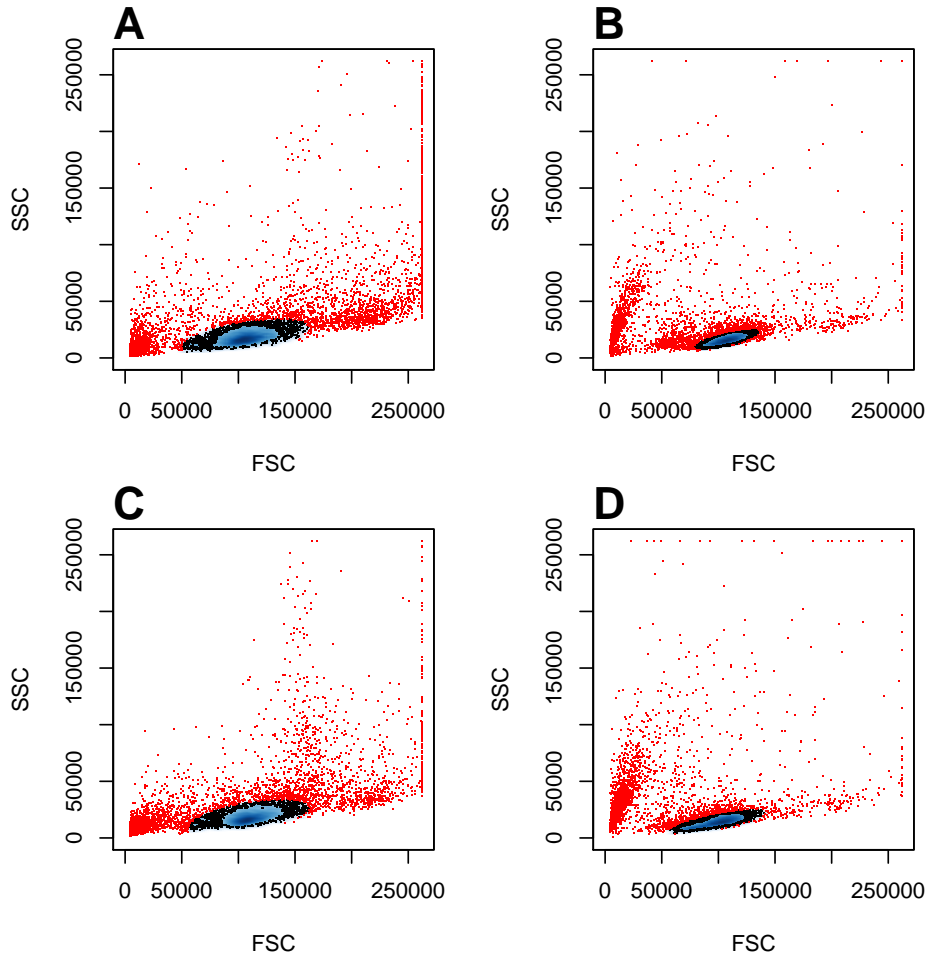

Figure S-1: Gating on Forward and Side Scatter to identify live splenocytes that were included in subsequent analysis: Pre-sort fraction (A), CD4<sup>+</sup> fraction (B), CD4<sup>-</sup> fraction (C), and CD4<sup>+</sup>CD62L<sup>+</sup> fraction (D). The live cells are shown in blue. Rejected cells appear as red dots.

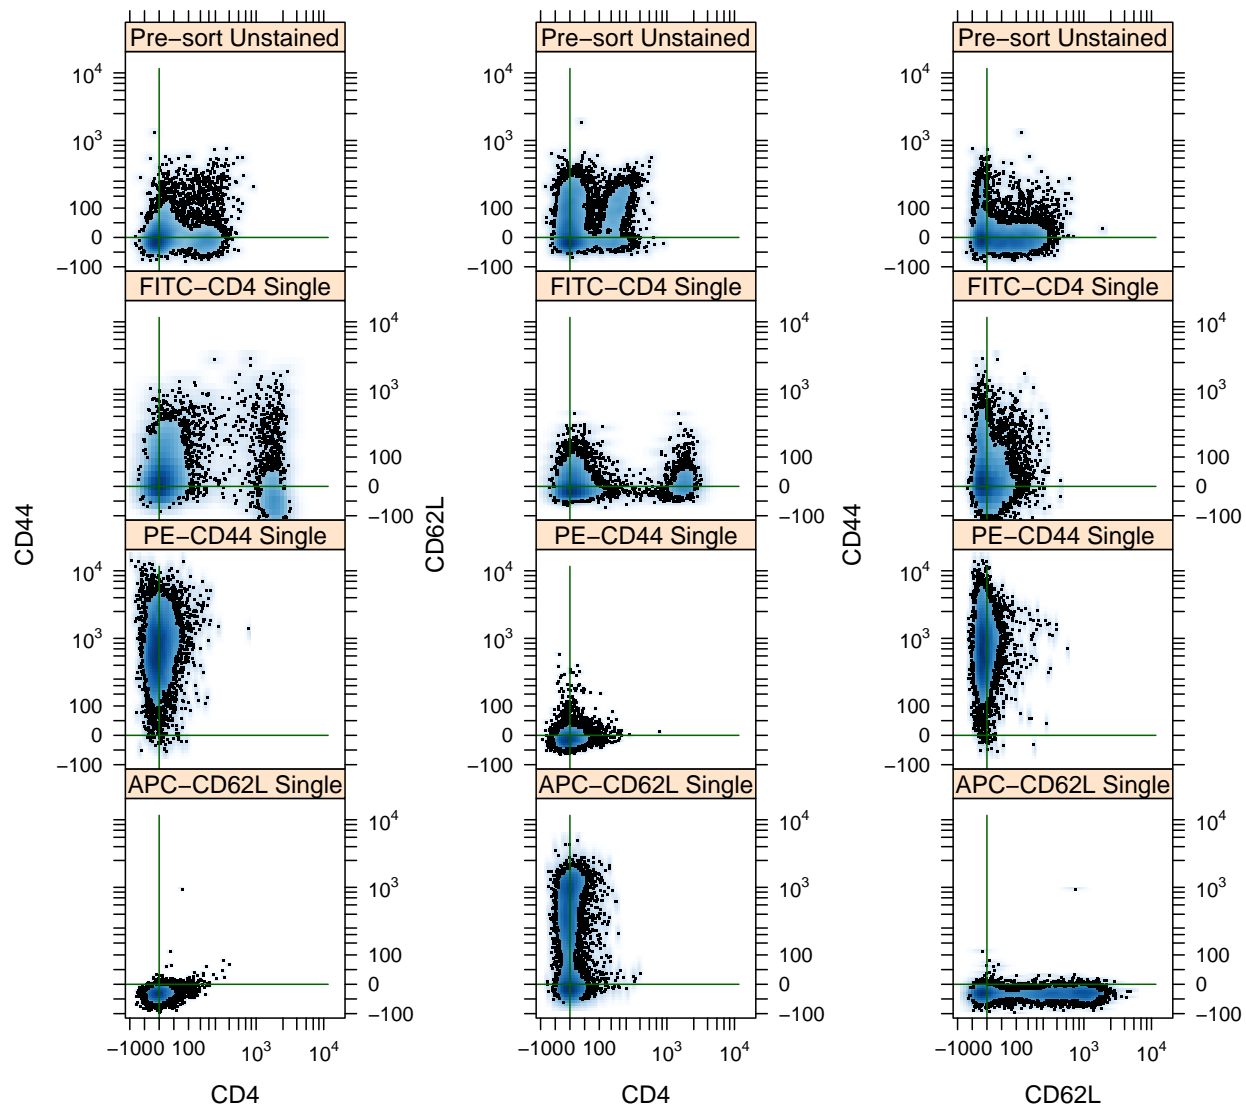

Figure S-2: Pairwise density plots for all three channels - CD4, CD44, and CD62L - shown separately for an unstained aliquot of the pre-sort population and singly stained controls: FITC-CD4, PE-CD44, and APC-CD62L. Each panel corresponds to a particular pair: CD44 versus CD4 (left panel), CD62L versus CD4 (center panel), and CD44 versus CD62L (right panel).

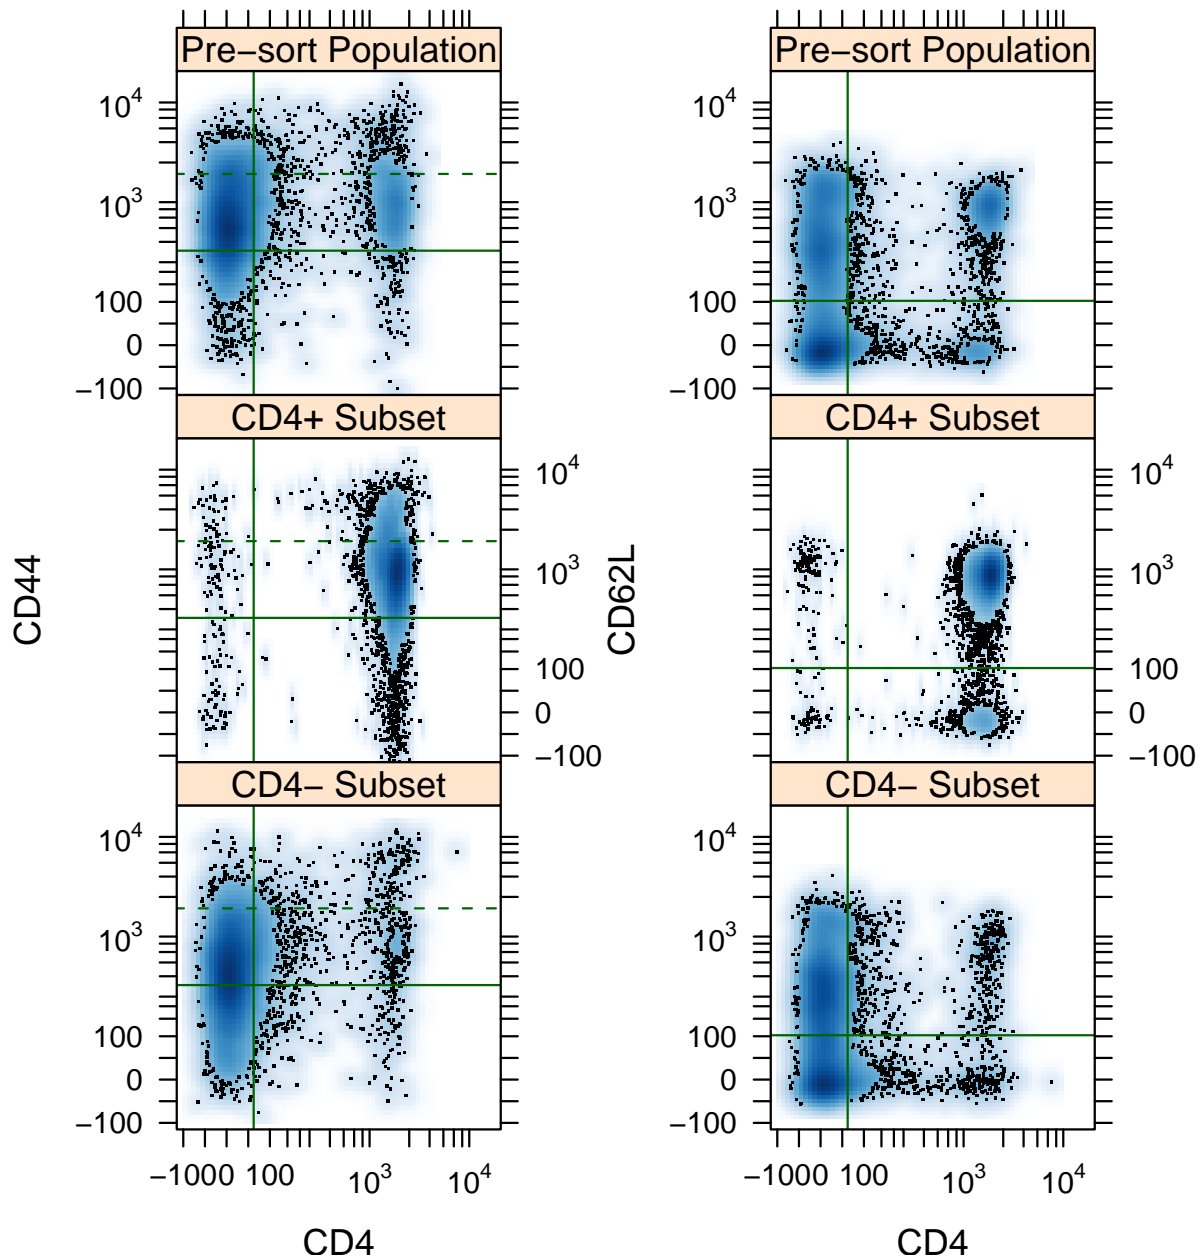

Figure S-3: Pairwise density plots for CD4, CD62L, and CD44 expression shown separately for aliquots obtained from pre-sort, CD4<sup>+</sup>, and CD4<sup>-</sup> fractions. Each panel corresponds to a particular pair: CD44 versus CD4 (left panel) and CD62L versus CD4 (right panel). The solid lines indicate the expression threshold for a cell to be associated with positive expression. Ninety five percent of the unstained cell fraction was contained below the threshold. The dotted line indicates the upper limit of CD44 expression for 95% of the CD4<sup>+</sup>CD62L<sup>+</sup> fraction.
